# Supplementary material for: Cobalt Ferrite Nanorods Synthesized with a Facile “Green” Method in a Magnetic Field
Source: MDPI journal article supplement (doi:10.3390/nano14060541), 2024-03-20
Supplement: s1 [file s1]

Supplementary Information  
for  
Cobalt Ferrite Nanorods Synthesized with a Facile  
“Green” Method in Magnetic Field

*Alexander L. Kwiatkowski, Petr V. Shvets, Ivan S. Timchenko, Darya E. Kessel, Elizaveta D. Shipkova, Konstantin I. Maslakov, Ivan A. Kuznetsov, Dmitry A. Muravlev, Olga E. Philippova and Andrey V. Shibaev*

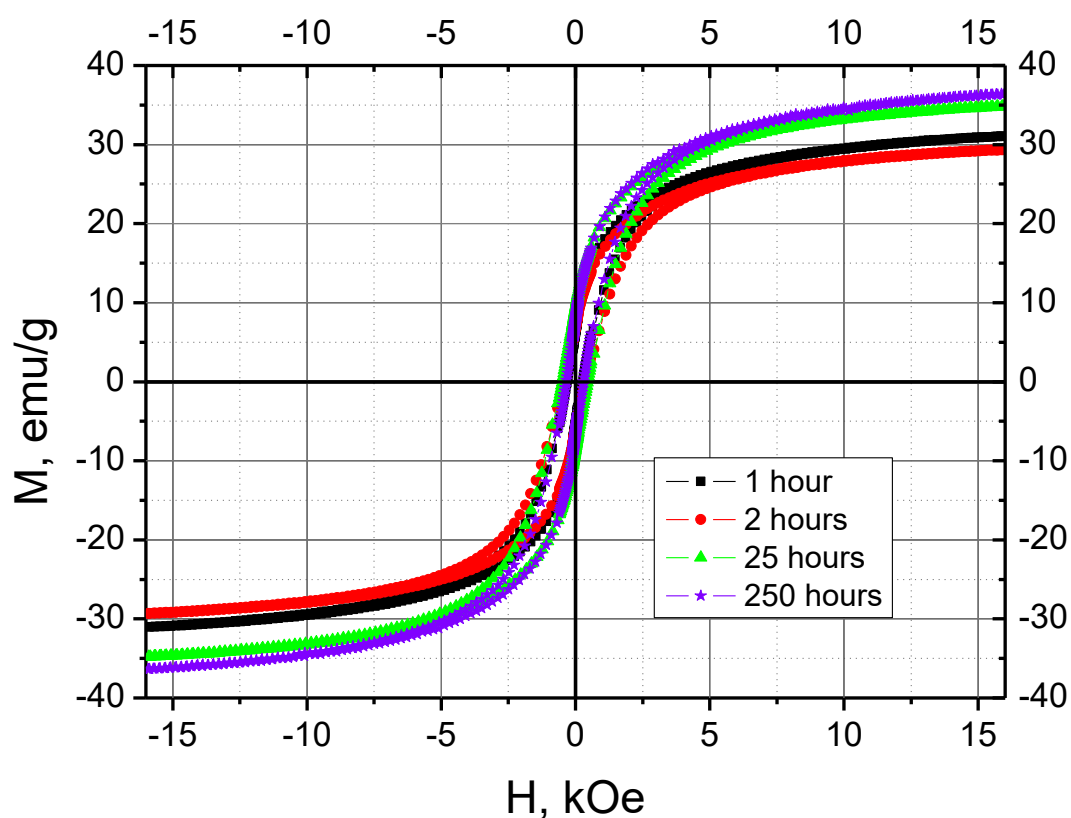

**Figure S1.** Hysteresis loops of cobalt ferrite nanorods after aging for different periods of time at 80°C.
